# Supplementary material for: Direct Observation of α-Synuclein Amyloid Aggregates in Endocytic Vesicles of Neuroblastoma Cells
Source: PubMed Central journal article supplement (PMC4841506; doi:10.1371/journal.pone.0153020), 2016-04-22

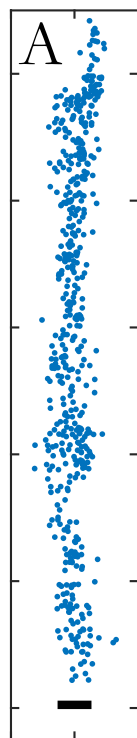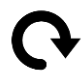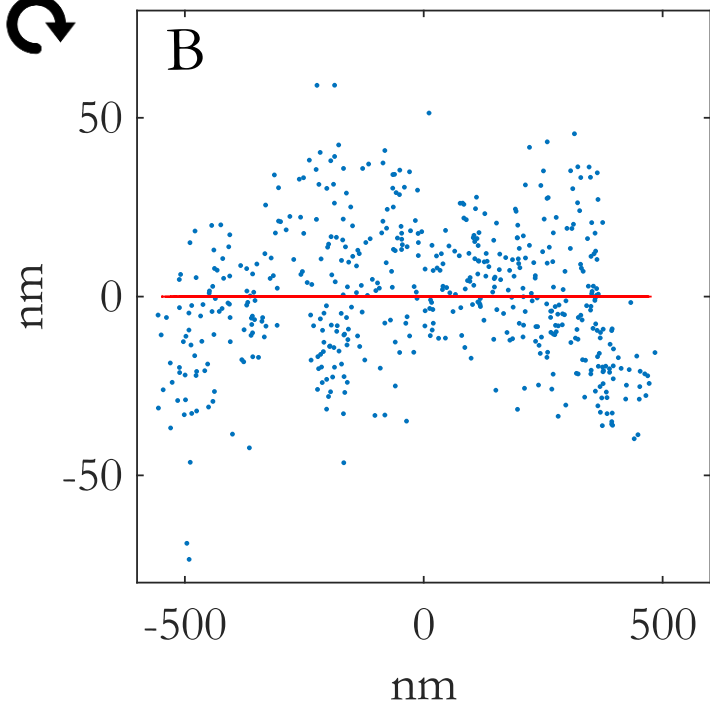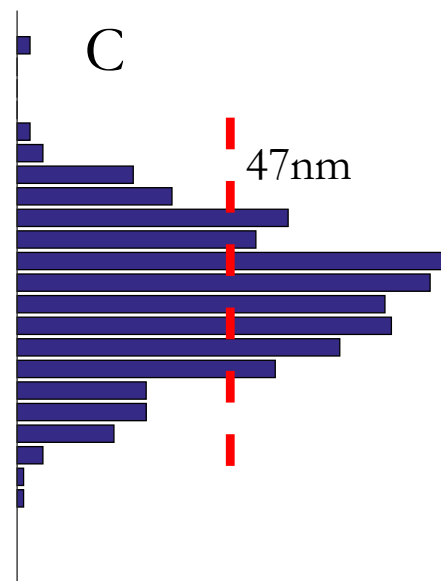

Supplement: pone.0153020.s001.pdf [file pone.0153020.s001.pdf]
