# Supplementary material for: Direct Observation of α-Synuclein Amyloid Aggregates in Endocytic Vesicles of Neuroblastoma Cells
Source: PLOS journal article supplement (doi:10.1371/journal.pone.0153020), 2016-04-22

**Figure S2.**

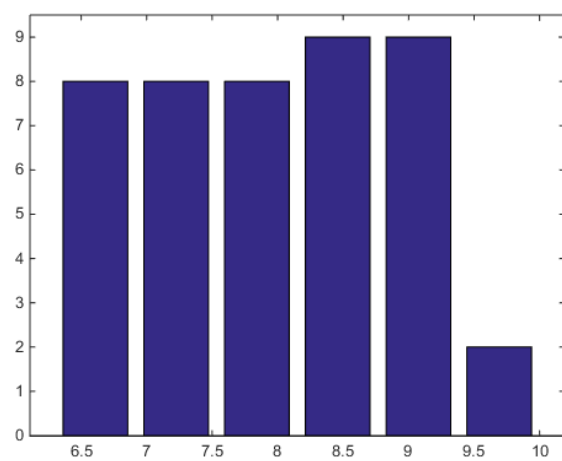

Supplement: S2 (10.1371/journal.pone.0153020.s002) [file journal.pone.0153020.s002]
